# Supplementary material
Source: HighWire-hosted journal article supplement (https://erj.ersjournals.com/content/61/5/2202169)
Supplement: inline-supplementary-material-1 [file inline-supplementary-material-1.pdf]

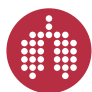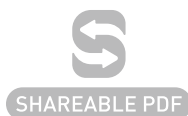

# Physical manoeuvres in patients with ARDS and low compliance: bedside approaches to detect lung hyperinflation and optimise mechanical ventilation

Emanuele Rezoagli<sup>1,2,6</sup>, Luca Bastia<sup>3,6</sup>, Laurent Brochard<sup>4,5,7</sup> and Giacomo Bellani <sup>1,2,7</sup>

<sup>1</sup>School of Medicine and Surgery, University of Milano-Bicocca, Monza, Italy. <sup>2</sup>Department of Emergency and Intensive Care, Fondazione IRCCS San Gerardo dei Tintori, Monza, Italy. <sup>3</sup>Neurointensive Care Unit, ASST Grande Ospedale Metropolitano Niguarda, Milan, Italy. <sup>4</sup>Keenan Research Centre for Biomedical Science, Li Ka Shing Knowledge Institute, Unity Health Toronto, Toronto, ON, Canada. <sup>5</sup>Interdepartmental Division of Critical Care, University of Toronto, Toronto, ON, Canada. <sup>6</sup>Co-first authors. <sup>7</sup>Co-senior authors.

Corresponding author: Giacomo Bellani ([giacomo.bellani1@unimib.it](mailto:giacomo.bellani1@unimib.it))

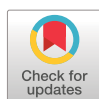

Shareable abstract (@ERSpublications)

**Chest wall compression may detect lung hyperinflation at the bedside in patients undergoing mechanical ventilation with ARDS and low compliance. This manoeuvre may optimise ventilator settings during mechanical ventilation.** <https://bit.ly/43lz8PU>

**Cite this article as:** Rezoagli E, Bastia L, Brochard L, *et al.* Physical manoeuvres in patients with ARDS and low compliance: bedside approaches to detect lung hyperinflation and optimise mechanical ventilation. *Eur Respir J* 2023; 61: 2202169 [DOI: 10.1183/13993003.02169-2022].

This single-page version can be shared freely online.

Copyright ©The authors 2023.  
For reproduction rights and  
permissions contact  
[permissions@ersnet.org](mailto:permissions@ersnet.org)

Received: 14 Nov 2022  
Accepted: 30 March 2023

Mechanical ventilation in acute respiratory distress syndrome (ARDS) aims at delivering protective tidal volume within lungs that are characterised both by collapsed and hyperinflated tissue, and gravity plays a key role in the distribution of aeration [1]. Therefore, mechanical factors exterior to the lungs influence ventilation–perfusion relationships. For instance, prone positioning affects lung and chest wall geometry leading to beneficial physiological changes [2], whereas chest wall restriction is known to decrease lung resting volume [3]; applying negative pressure on the abdomen may generate a regional reopening of the lung [4]. Furthermore, sequential lateral positioning has been recently proposed as a potential manoeuvre to redistribute lung resting volume and promote alveolar recruitment [5].
